# Supplementary material for: Mg–Al hydrotalcite-supported Pd catalyst for low-temperature CO oxidation: effect of Pdn+ species and surface hydroxyl groups
Source: Royal Society of Chemistry journal article supplement (doi:10.1039/c8dt03012j), 2018-01-01
Supplement: c8dt03012j1.pdf [file c8dt03012j1.pdf]

## Supporting Information

### **Mg-Al Hydrotalcite Supported Pd Catalyst for Low-temperature CO Oxidation: Effect of Pd<sup>n+</sup> Species and Surface Hydroxyl Groups**

Xingyi Lin, Jianke Zhou, Yanyu Fan, Yingying Zhan, Chongqi Chen\*, Dalin Li\* and Lilong Jiang

National Engineering Research Center of Chemical Fertilizer Catalyst, Fuzhou University, Fuzhou 350002,  
Fujian, China

\*Corresponding authors' E-mail: [c.q.chen@fzu.edu.cn](mailto:c.q.chen@fzu.edu.cn); [dalinli@fzu.edu.cn](mailto:dalinli@fzu.edu.cn)

Tel: +86-591-8373-1234-8216; Fax: +86-591-8373-8808.

**Figure S1**

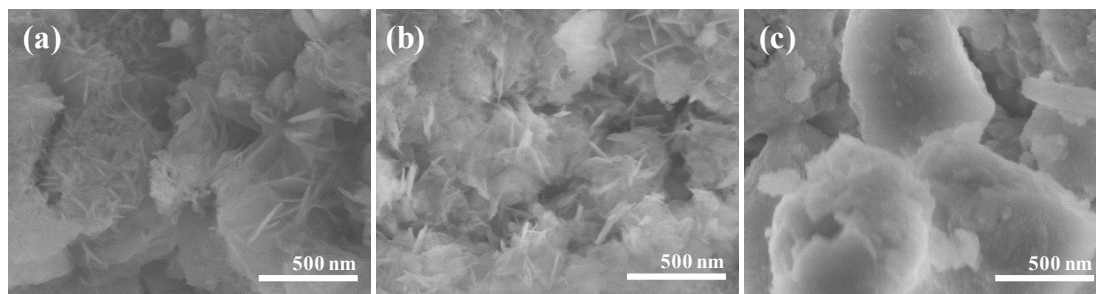

**Figure S1** SEM images of the supported Pd catalysts: (a) Pd/MgAl-HT, (b) Pd/Mg(OH)<sub>2</sub>, and (c) Pd/Al(OH)<sub>3</sub>.

**Figure S2**

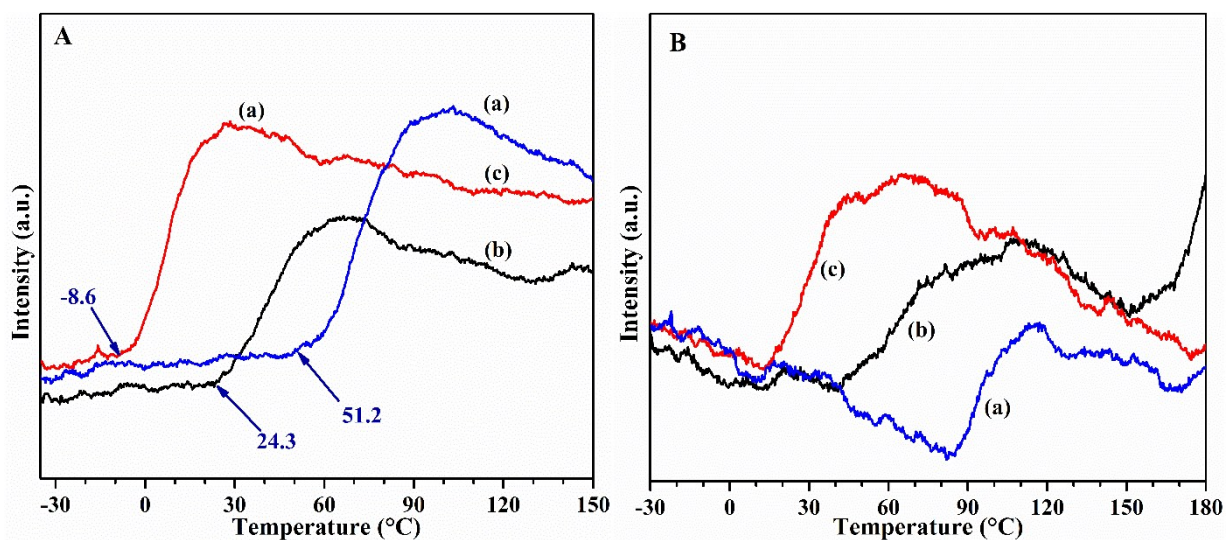

**Figure S2** (A) O<sub>2</sub>-TPO profiles after H<sub>2</sub>-TPR measurement and (B) H<sub>2</sub>-TPR profiles after TPR-TPO experiment of the supported Pd catalysts: (a) Pd/MgAl-HT, (b) Pd/Mg(OH)<sub>2</sub>, and (c) Pd/Al(OH)<sub>3</sub>.

**Figure S3**

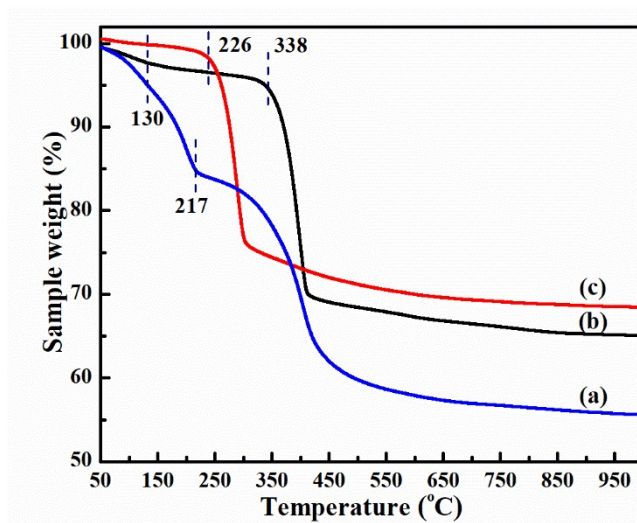

**Figure S3** TG profiles of the supported Pd catalysts: (a) Pd/MgAl-HT, (b) Pd/Mg(OH)<sub>2</sub>, and (c) Pd/Al(OH)<sub>3</sub>.

**Figure S4**

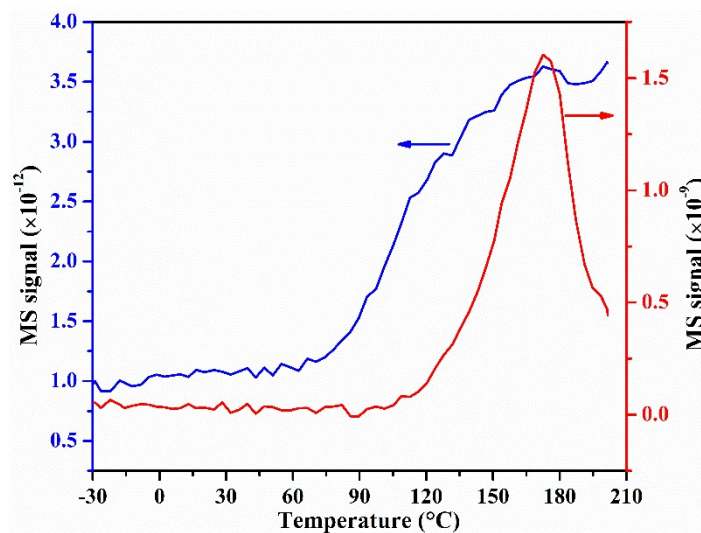

**Figure S4** MS signals of Pd/MgAl-HT in the CO-TPR measurement.

Figure S5

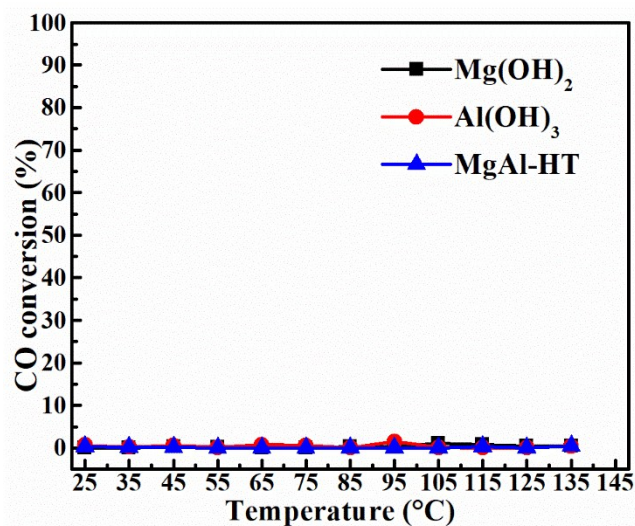

Figure S5 Catalytic performance of the MgAl-HT, Mg(OH)<sub>2</sub> and Al(OH)<sub>3</sub> supports for CO oxidation.

Figure S6

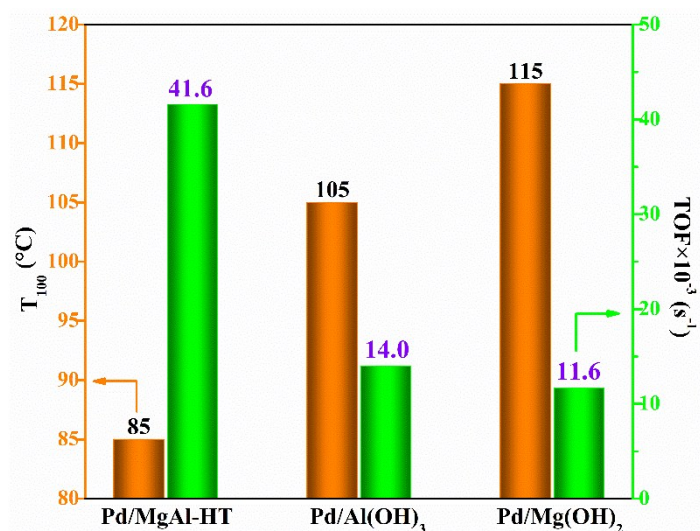

Figure S6 T<sub>100</sub> (Temperature for 100 % CO conversion) and TOF at 50°C of the MgAl-HT, Pd/Mg(OH)<sub>2</sub> and Pd/Al(OH)<sub>3</sub> catalysts for CO oxidation.
